# Supplementary material for: Use of factor scores in multiple regression analysis for estimation of body weight by certain body measurements in Romanov Lambs
Source: PeerJ. 2019 Aug 1;7:e7434. doi: 10.7717/peerj.7434 (PMC6679909; doi:10.7717/peerj.7434)
Supplement: Supplemental Information 1 [file peerj-07-7434-s001.xlsx]

## Sheet: Sayfa1
body weight	wither height	croup height	body length	chest depth	chest circumference	chest width behind shoulders	head length
22.9	53.9	53.6	49.8	23	74.2	13.3	13.3
21.8	51	50.8	49.4	22.6	71.3	14	13.1
24.7	56.2	56	51.7	28.2	73.4	13.5	13.8
24.6	54.3	54	50.7	24.7	75.7	13.8	14.9
23.8	51.7	51.4	51.7	25.7	71.7	13.5	15.2
27.8	61	60.6	52.1	26.2	78.3	12.6	13.6
25.8	55.2	55	47.1	25.6	73.2	13.6	15.4
24.2	54.2	53.8	51.3	25	75.1	12.7	14.9
24.9	55.9	55.5	51.8	24.5	76.2	13	14.4
27.2	56.2	56	47.8	24.7	74.8	13.4	14.3
27.4	57	56.5	49.8	28	78	14.2	14.4
25.1	56.2	56	51.4	24.6	74.3	13	13.1
25.8	52.7	52	52.2	25.1	75.6	13	12.7
23.6	53.8	53.6	48.3	25.4	67.4	12.2	11.4
24.4	53.7	53.4	48	25	71.6	12.4	13.2
27	57	57	53	28.5	73	13.2	13.6
27.6	57.5	57	53.5	29.5	73.5	13.1	15.1
26.2	56.2	56	51.7	28.2	72	12.6	15.2
27	57.7	57.2	53.3	29.2	73.6	12.2	13.7
24.1	51.8	51.7	47.7	25.6	73	12.4	12.4
17.3	45.3	45.2	45.6	23.9	64.6	11.6	12.5
22	53.4	53.2	46	24.2	70.2	13.8	14
23.7	54.8	54.4	50.2	25.7	70.7	13.4	13
23.9	57.4	57.3	52.3	28.7	72.8	14	14.6
26.9	55.5	55	48.9	26.8	76.4	13	12.2
23.4	53.1	53	49.2	22.8	73.9	15	15.7
25.4	54	53.6	50.7	22.7	75.6	14.2	16.4
23	52	51.8	46.9	27.4	74.3	13.2	12.7
25.9	54.2	54	50.6	23.9	76.7	14	14
26	54.8	54.5	50.1	25	73.1	14.6	14
27.2	55.4	55.2	49.2	27	77	13.2	14.6
27	55	54.6	50.4	25.7	75.7	14	14
30	62.2	62	52.6	27	80	14.5	15.1
26.9	55	54.7	51.9	26	78	13.8	14
28.1	59	58.7	55	25.9	76.7	12.2	12.3
25.1	55.4	55.3	52.4	25.9	75.8	12.4	13.2
16.2	45	44.7	44.8	23.3	68.8	11.2	12.3
22.8	53.6	53.3	48.2	24.8	70.5	12.6	13
22	53.1	53	48	24.4	70	12.2	14.8
23.3	54	53.8	51	24	75	13.3	14
24.9	56.9	56.4	52	29	73.9	13.6	14.2
25.2	55	54.7	48	26.2	76	13.4	12.1
27.6	58.3	58	52	25.8	78	13	13.9
26.8	55	54.9	50.2	25.3	75.7	12.8	12.9
27.8	58.2	58	54.9	25.9	77	13.4	15
27.8	55.2	54	51	25.7	75.7	14	14
26.3	54	54	50.8	23.9	76.7	14	14
25.8	54.8	54	50.9	22.7	75.6	14.2	16.4
25	53.4	53.4	48	25	71.6	12.4	13.2
24.2	52	51.6	51.7	25.7	72	13.5	15.2
